# Supplementary material for: Vascular endothelial growth factor C promotes breast cancer progression via a novel antioxidant mechanism that involves regulation of superoxide dismutase 3
Source: PubMed Central journal article supplement (PMC4303136; doi:10.1186/s13058-014-0462-2), 2014-10-30

# H2O2

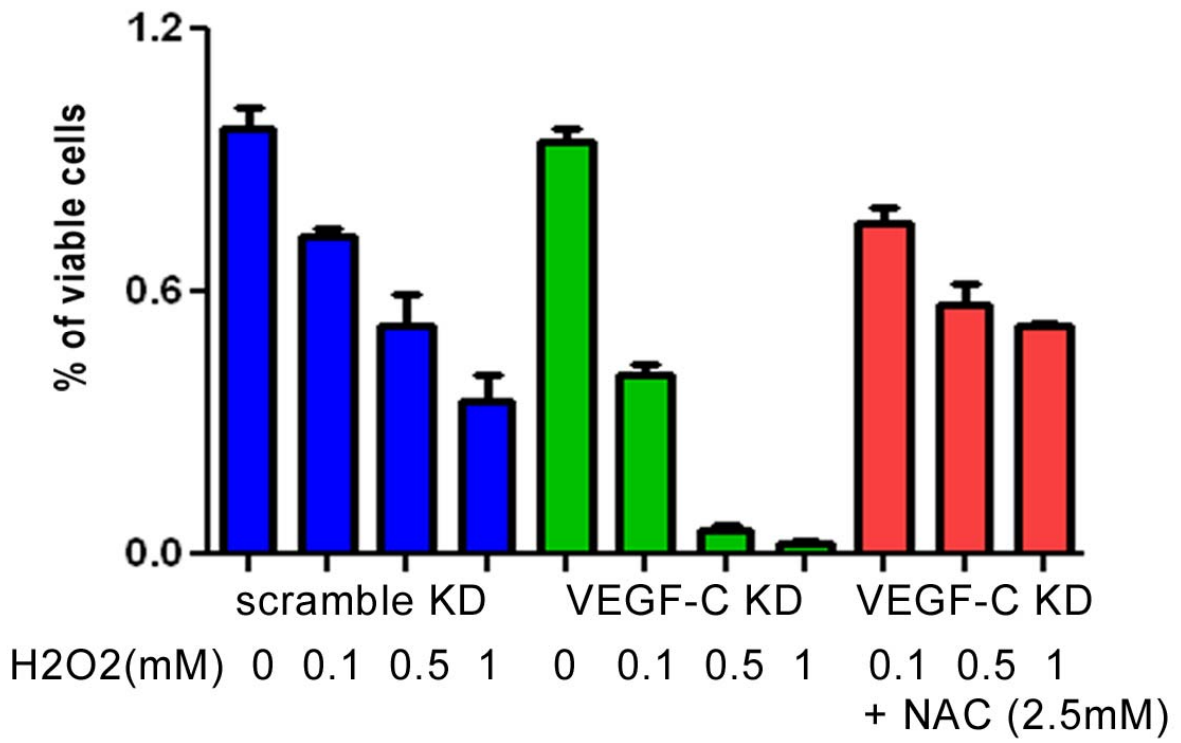

Supplement: 13058_2014_462_MOESM6_ESM.pdf [file 13058_2014_462_MOESM6_ESM.pdf]
