# Supplementary material for: Vascular endothelial growth factor C promotes breast cancer progression via a novel antioxidant mechanism that involves regulation of superoxide dismutase 3
Source: PubMed Central journal article supplement (PMC4303136; doi:10.1186/s13058-014-0462-2), 2014-10-30
Supplement: 13058_2014_462_MOESM8_ESM.pdf [file 13058_2014_462_MOESM8_ESM.pdf]

# MDA-MB-231

---

NS      VEGFC KD  
         #1    #2

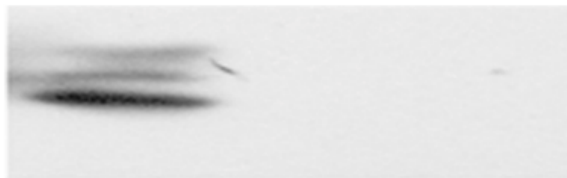

Sod3

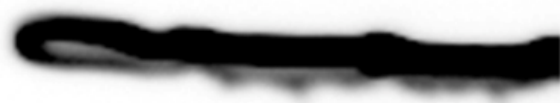

$\beta$ -actin
